# Supplementary material for: Construct validity and internal consistency of the Breast Inflammatory Symptom Severity Index in lactating mothers with inflammatory breast conditions
Source: PeerJ. 2021 Nov 16;9:e12439. doi: 10.7717/peerj.12439 (PMC8603819; doi:10.7717/peerj.12439)
Supplement: Supplemental Information 2 — Identifying data such as maternal date of birth has been removed. The variables collected during the audit from the patient records of the 160 mothers treated for ICLB were used for the statistical analysis. [file peerj-09-12439-s002.xlsx]

## Sheet: Clean data
record_id	maternal_dob	maternal_parity	number_of_children	bf_infant_age	(infant's age in weeks for analysis)	infant_mode_delivery	postcode_ses	private_health_insurance	maternal_occupation	appointment_date	(appointment date - formula format)	(for month of presentation calculation)	affected_breast	symptom_onset (in days)	symptom_onset_other (text response)	(symptom onset in days for analysis)	left_local_symptoms_1	left_local_symptoms_2	left_local_symptoms_3	left_local_symptoms_4	left_local_symptoms_5	left_local_symptoms_6	left_local_symptoms_7	left_local_symptoms_8	left_local_symptoms_9	left_local_symptoms_10	left_local_symptoms_11	left_local_symptoms_999	left_impaired_function (text response)	left_local_sympt_other (text response)	left_local_sympt_number (TOTAL)	left_local_sympt_number (BREAST)	left_local_sympt_number (NIPPLE)	right_local_symptoms_1	right_local_symptoms_2	right_local_symptoms_3	right_local_symptoms_4	right_local_symptoms_5	right_local_symptoms_6	right_local_symptoms_7	right_local_symptoms_8	right_local_symptoms_9	right_local_symptoms_10	right_local_symptoms_11	right_local_symptoms_999	right_impaired_function (text response)	right_local_sympt_other (text response)	right_local_sympt_number (TOTAL)	right_local_sympt_number (BREAST)
1	(identifier)	1	1	4 weeks	4	1	3058	Y	Lawyer	2020-09-07	2020-09-07	2020-09-01	1	999		999	0	0	0	1	1	0	1	1	1	0	0	0	reduced milk expression: was getting 120ml now only 50-60ml		5	2	3	0	0	0	0	0	0	0	0	0	0	0	0			0	0
2	(identifier)	2	2	4 weeks old	4	1	9999	Y	NR	2020-09-05	2020-09-05	2020-09-01	2	3		3	0	0	0	0	0	0	0	0	0	0	0	0			0	0	0	0	0	0	1	0	0	0	0	0	0	0	0			1	1
3	(identifier)	2	2	8 weeks	8	1	3078	Y	Lawyer	2020-09-04	2020-09-04	2020-09-01	2	2		2	0	0	0	0	0	0	0	0	0	0	0	0			0	0	0	1	0	0	1	0	0	0	0	1	0	0	0			3	2
4	(identifier)	1	1	12 weeks	12	1	3078	Y	Graphic designer	2020-08-28	2020-08-28	2020-08-01	1	999		999	0	0	0	0	0	0	0	0	0	1	0	0			1	0	1	0	0	0	0	0	0	0	0	0	0	0	0			0	0
5	(identifier)	2	2	12 weeks	12	1	3072	Y	Operations Director	2020-08-28	2020-08-28	2020-08-01	2	3		3	0	0	0	0	0	0	0	0	0	0	0	0			0	0	0	0	0	0	1	0	0	0	1	0	0	0	0			2	1
6	(identifier)	1	1	4.5 weeks	4.5	2	3078	Y	Doctor	2020-08-27	2020-08-27	2020-08-01	2	999		999	0	0	0	0	0	0	0	0	0	0	0	0			0	0	0	0	0	0	1	0	0	0	0	0	0	0	0			1	1
7	(identifier)	2	2	13 weeks	13	999	3078	Unknown	Finance	2020-08-25	2020-08-25	2020-08-01	2	1		1	0	0	0	0	0	0	0	0	0	0	0	0			0	0	0	1	0	0	1	0	0	0	0	0	0	0	0			2	2
8	(identifier)	1	1	8 days	1.14	1	3181	Unknown	PR Manager	2020-08-22	2020-08-22	2020-08-01	3	999		999	0	0	0	1	0	0	0	0	0	0	0	0			1	1	0	0	0	0	1	0	0	0	0	0	0	0	0			1	1
9	(identifier)	1	1	4.5 months	19.55	1	3101	Y	Secondary teacher	2020-08-18	2020-08-18	2020-08-01	1	11	3 weeks ago	21	0	0	1	1	0	0	0	0	0	0	0	0			2	2	0	0	0	0	0	0	0	0	0	0	0	0	0			0	0
10	(identifier)	1	1	2 months	8.69	2	3109	Unknown	Logistic manager	2020-08-13	2020-08-13	2020-08-01	3	2		2	0	0	0	1	0	0	0	0	0	0	1	0		Bruising (from vigorous massage)	2	2	0	0	0	0	1	0	0	0	0	0	0	1	0		Bruising (from vigorous massage)	2	2
11	(identifier)	2	2	9.5 weeks	9.5	999	3072	Unknown	Social worker	2020-08-11	2020-08-11	2020-08-01	2	2		2	0	0	0	0	0	0	0	0	0	0	0	0			0	0	0	0	0	0	0	0	0	0	0	0	0	1	1		"mastitis"	999	999
12	(identifier)	1	1	8 weeks	8	1	3072	Y	Executive assistant	2020-08-10	2020-08-10	2020-08-01	2	999		999	0	0	0	0	0	0	0	0	0	0	0	0			0	0	0	1	0	0	1	0	1	0	1	0	1	0	0			5	2
13	(identifier)	1	1	4 months	17.38	2	3046	Unknown	Social worker	2020-08-06	2020-08-06	2020-08-01	3	8		8	1	0	0	1	0	0	0	0	0	0	0	0			2	2	0	1	0	0	1	0	0	0	0	0	0	0	0			2	2
14	(identifier)	999	999	7 weeks	7	1	3121	Y	Project Manager	2020-08-06	2020-08-06	2020-08-01	1	10		10	1	0	0	1	0	0	0	1	0	0	0	0			3	2	1	0	0	0	0	0	0	0	0	0	0	0	0			0	0
15	(identifier)	1	1	10 months	43.45	1	3073	Unknown	Retail manager	2020-08-06	2020-08-06	2020-08-01	3	10		10	1	0	0	1	0	0	0	0	0	0	0	0			2	2	0	1	0	0	1	0	0	0	0	0	0	0	0			2	2
16	(identifier)	2	2	10 weeks	10	999	3075	Y	(currently on mat leave)	2020-08-22	2020-08-22	2020-08-01	3	2		2	1	0	0	1	0	1	0	0	0	0	0	0			3	2	1	0	0	0	0	0	0	0	1	0	0	0	0			1	0
17	(identifier)	2	2	9 months	39.11	1	3073	Unknown	NR	2020-07-20	2020-07-20	2020-07-01	2	4		4	0	0	0	0	0	0	0	0	0	0	0	0			0	0	0	1	0	0	1	0	1	0	0	0	0	0	0			3	2
18	(identifier)	1	1	8 months	34.76	1	3066	Y	Social worker	2020-07-14	2020-07-14	2020-07-01	1	1		1	1	0	0	1	0	0	0	0	0	0	0	0			2	2	0	0	0	0	0	0	0	0	0	0	0	0	0			0	0
19	(identifier)	1	1	23 weeks	23	999	9999	Unknown	NR	2020-07-07	2020-07-07	2020-07-01	2	2		2	0	0	0	0	0	0	0	0	0	0	0	0			0	0	0	1	0	0	1	0	1	0	1	0	0	0	0			4	2
20	(identifier)	1	1	3 weeks	3	2	9999	Y	NR	2020-07-07	2020-07-07	2020-07-01	2	11	on & off since birth; increase in symptoms past 1-2 days	1.5	0	0	0	0	0	0	0	0	0	0	0	0			0	0	0	1	0	0	1	0	0	1	0	0	0	0	0			3	2
21	(identifier)	1	1	7 weeks	7	1	3071	Y	Midwife	2020-07-04	2020-07-04	2020-07-01	3	2		2	1	0	0	1	1	0	0	0	0	0	0	0	decreased milk flow		3	3	0	1	0	0	1	0	0	0	0	0	0	0	0			2	2
22	(identifier)	1	1	12 weeks	12	1	9999	Unknown	NR	2020-06-25	2020-06-25	2020-06-01	2	11	3-4 days	3.5	0	0	0	0	0	0	0	0	0	0	0	0			0	0	0	0	0	0	1	0	0	0	0	1	1	0	0			3	1
23	(identifier)	1	1	6 weeks	6	2	3078	Unknown	Office work	2020-06-23	2020-06-23	2020-06-01	2	5		5	0	0	0	0	0	0	0	0	0	0	0	0			0	0	0	1	1	0	1	0	0	0	0	0	0	0	0			3	3
24	(identifier)	2	3	13 days	1.86	1	3071	Y	Graphic designer	2020-06-13	2020-06-13	2020-06-01	2	2		2	0	0	0	0	0	0	0	0	0	0	0	0			0	0	0	1	0	0	0	0	0	0	0	0	0	0	0			1	1
25	(identifier)	1	1	3 weeks	3	1	3070	Y	NR	2020-06-13	2020-06-13	2020-06-01	2	999		999	0	0	0	0	0	0	0	0	0	0	0	0			0	0	0	0	0	0	1	0	0	0	0	0	0	0	0			1	1
26	(identifier)	2	3	6 weeks	6	1	3078	Y	General Manager	2020-06-06	2020-06-06	2020-06-01	2	1		1	0	0	0	0	0	0	0	0	0	0	0	0			0	0	0	0	0	0	0	0	0	0	1	0	1	0	0			2	0
27	(identifier)	1	1	3 weeks	3	1	3078	Y	Sales	2020-05-30	2020-05-30	2020-05-01	1	2		2	0	0	0	0	0	0	0	0	0	0	0	1			999	999	999	0	0	0	0	0	0	0	0	0	0	0	0			0	0
28	(identifier)	1	1	1 week	1	1	3072	Unknown	Banking	2020-05-25	2020-05-25	2020-05-01	3	2		2	1	0	0	1	0	0	0	0	0	0	0	0			2	2	0	1	0	0	1	0	0	0	0	0	0	0	0			2	2
29	(identifier)	1	1	6 weeks	6	2	3078	Y	IT Change Manager	2020-06-29	2020-06-29	2020-06-01	2	1		1	0	0	0	0	0	0	0	0	0	0	0	0			0	0	0	1	0	0	1	0	0	0	0	0	0	0	0			2	2
30	(identifier)	2	2	10 weeks	10	2	3084	Unknown	Editor	2020-05-19	2020-05-19	2020-05-01	3	6		6	0	0	0	0	0	0	0	0	0	0	1	1		"mastitis"	999	999	999	0	0	0	0	0	0	0	0	0	0	1	1		"mastitis"	999	999
31	(identifier)	2	2	5.5 months	23.9	999	3070	Y	Comms manager	2020-05-16	2020-05-16	2020-05-01	1	2		2	1	0	0	1	0	0	0	0	0	0	0	0			2	2	0	0	0	0	0	0	0	0	0	0	0	0	0			0	0
32	(identifier)	1	1	4 weeks	4	1	3071	Y	Administration	2020-04-17	2020-04-17	2020-04-01	2	5		5	0	0	0	0	0	0	0	0	0	0	0	0			0	0	0	0	0	0	0	0	0	0	0	0	0	0	1			999	999
33	(identifier)	999	999	9 months	39.11	999	3070	Unknown	Organisational Psychologist	2020-04-14	2020-04-14	2020-04-01	2	999		999	0	0	0	0	0	0	0	0	0	0	0	0			0	0	0	1	0	0	0	1	0	0	1	0	0	0	0	R breast not producing as much		3	2
34	(identifier)	1	1	4 weeks	4	999	3053	Y	Graphic designer	2020-03-27	2020-03-27	2020-03-01	3	11	11	11	1	0	0	1	0	0	0	0	0	0	0	0			2	2	0	1	0	0	1	0	0	0	0	0	0	0	0			2	2
35	(identifier)	1	1	2 weeks	2	2	3078	Y	Student	2020-03-25	2020-03-25	2020-03-01	1	11	4-5 days	4.5	0	0	0	1	0	0	0	1	0	0	0	0			2	1	1	0	0	0	0	0	0	0	0	0	0	0	0			0	0
36	(identifier)	1	1	5 months	21.73	999	3058	Unknown	NR	2020-03-23	2020-03-23	2020-03-01	2	1		1	0	0	0	0	0	0	0	0	0	0	0	0			0	0	0	1	0	0	1	0	0	0	0	0	0	0	0			2	2
37	(identifier)	2	3	7 months	30.42	2	3070	Y	Accountant	2020-03-20	2020-03-20	2020-03-01	1	2		2	1	1	0	1	0	0	0	0	0	0	0	0			3	3	0	0	0	0	0	0	0	0	0	0	0	0	0			0	0
38	(identifier)	2	999	3 weeks	3	1	3060	Y	Social worker	2020-03-13	2020-03-13	2020-03-01	2	0		0	0	0	0	0	0	0	0	0	0	0	0	0			0	0	0	1	1	0	0	0	0	0	0	0	1	0	0			3	2
39	(identifier)	2	999	13 days	1.86	999	3032	Unknown	NR	2020-02-25	2020-02-25	2020-02-01	1	2		2	1	1	0	0	0	0	1	0	1	0	0	0			4	2	2	0	0	0	0	0	0	0	0	0	0	0	0			0	0
40	(identifier)	1	1	7 months	30.42	999	3072	Unknown	Pastry chef	2020-03-06	2020-03-06	2020-03-01	3	2		2	1	0	0	1	0	1	0	1	0	0	0	0			4	2	2	1	0	0	0	0	1	0	1	0	0	0	0			3	1
41	(identifier)	2	2	3.5 weeks	3.5	1	3071	Y	Heritage officer	2020-02-28	2020-02-28	2020-02-01	2	2		2	0	0	0	0	0	0	0	0	0	0	0	0			0	0	0	0	0	0	1	0	0	0	0	0	0	0	0			1	1
42	(identifier)	2	2	9.5 weeks	9.5	2	3071	Y	NR	2020-02-18	2020-02-18	2020-02-01	1	1		1	1	1	0	0	0	0	0	0	0	0	0	0			2	2	0	0	0	0	0	0	0	0	0	0	0	0	0			0	0
43	(identifier)	2	2	7 weeks	7	999	3071	Unknown	Health policy	2020-02-10	2020-02-10	2020-02-01	2	2		2	0	0	0	0	0	0	0	0	0	0	0	0			0	0	0	1	1	0	1	0	0	0	0	0	0	0	0			3	3
44	(identifier)	1	1	10 months	43.45	999	3071	Y	Social worker	2020-02-04	2020-02-04	2020-02-01	1	2		2	1	0	0	1	0	0	0	0	0	1	0	0			3	2	1	0	0	0	0	0	0	0	0	0	0	0	0			0	0
45	(identifier)	1	1	3 weeks	3	1	3073	Unknown	Marketing	2020-01-29	2020-01-29	2020-01-01	1	2		2	1	0	0	0	0	0	0	0	0	0	0	0			1	1	0	0	0	0	0	0	0	0	0	0	0	0	0			0	0
46	(identifier)	1	1	9 months	39.11	999	3081	Y	Medical representative	2020-01-23	2020-01-23	2020-01-01	1	11	3 weeks ago	21	0	0	0	1	0	1	0	0	0	1	0	0			3	1	2	0	0	0	0	0	0	0	0	0	0	0	0			0	0
47	(identifier)	2	2	3 months	13.04	2	3055	Y	Psychologist	2020-01-18	2020-01-18	2020-01-01	2	11	5 weeks ago	35	0	0	0	0	0	0	0	0	0	0	0	0			0	0	0	0	0	0	1	0	0	0	0	0	1	0	0			2	1
48	(identifier)	1	1	4 weeks	4	1	9999	Y	NR	2020-01-21	2020-01-21	2020-01-01	2	4		4	0	0	0	0	0	0	0	0	0	0	0	0			0	0	0	1	0	0	1	0	0	1	1	0	0	0	0			4	2
49	(identifier)	1	1	8 days	1.14	2	3070	Y	Public servent	2020-01-06	2020-01-06	2020-01-01	3	11	since milk came in	999	1	0	0	1	0	0	1	0	0	0	0	0			3	2	1	1	0	0	1	0	0	1	0	0	0	0	0			3	2
50	(identifier)	1	1	5 weeks	5	1	3093	Y	Event manager	2020-01-04	2020-01-04	2020-01-01	1	4		4	1	1	0	0	1	0	0	1	0	0	0	0	decreased milk flow		4	3	1	0	0	0	0	0	0	0	0	0	0	0	0			0	0
51	(identifier)	2	2	10 weeks	10	999	3084	Y	Product and project co-ordinator	2020-01-02	2020-01-02	2020-01-01	3	11	2 weeks	14	1	0	0	1	0	0	1	1	0	0	0	0			4	2	2	0	0	0	1	0	0	1	1	0	0	0	0			3	1
52	(identifier)	2	2	10 weeks	10	999	3055	Y	NR	2019-12-30	2019-12-30	2019-12-01	2	2		2	0	0	0	0	0	0	0	0	0	0	0	0			0	0	0	1	1	0	1	0	0	0	0	0	0	0	0			3	3
53	(identifier)	1	1	16 months	69.52	1	3071	Y	Office manager	2020-02-15	2020-02-15	2020-02-01	2	3		3	0	0	0	0	0	0	0	0	0	0	0	0			0	0	0	1	0	0	1	0	0	0	0	0	0	0	0			2	2
54	(identifier)	1	1	6 months	26.07	1	3032	Unknown	Auditor	2020-02-27	2020-02-27	2020-02-01	2	2		2	0	0	0	0	0	0	0	0	0	0	0	0			0	0	0	1	0	0	1	0	0	0	1	0	0	0	0			3	2
55	(identifier)	1	1	6 weeks	6	2	3073	Unknown	Executive assistant	2019-11-26	2019-11-26	2019-11-01	1	2		2	0	0	0	1	0	0	0	1	1	0	0	0			3	1	2	0	0	0	0	0	0	0	0	0	0	0	0			0	0
56	(identifier)	2	2	20 months	86.9	999	3073	Y	Nurse - Midwife	2019-12-12	2019-12-12	2019-12-01	2	1		1	0	0	0	0	0	0	0	0	0	0	0	0			0	0	0	1	1	0	0	0	0	0	0	0	0	0	0			2	2
57	(identifier)	2	2	8 months	34.76	1	3072	Unknown	Public servent	2019-12-09	2019-12-09	2019-12-01	2	1		1	0	0	0	0	0	0	0	0	0	0	0	0			0	0	0	0	0	0	0	0	0	0	0	0	0	0	1			999	999
58	(identifier)	2	2	1 week	1	999	3068	Y	NR	2019-11-28	2019-11-28	2019-11-01	2	999		999	0	0	0	0	0	0	0	0	0	0	0	0			0	0	0	0	0	0	1	0	0	0	0	0	0	0	0			1	1
59	(identifier)	1	1	10 weeks	10	1	3053	Y	Public servent	2019-11-30	2019-11-30	2019-11-01	1	1		1	1	1	0	0	0	0	0	0	0	1	0	0			3	2	1	0	0	0	0	0	0	0	0	0	0	0	0			0	0
60	(identifier)	1	1	14 weeks	14	1	3068	Y	Graphic designer	2017-07-21	2017-07-21	2017-07-01	2	11	painful lumps fortnightly since baby was 4/52 old	999	0	0	0	0	0	0	0	0	0	0	0	0			0	0	0	1	0	0	1	0	0	0	0	0	0	0	0			1	1
61	(identifier)	1	1	5 months	21.73	1	3113	Y	Marketing	2019-11-25	2019-11-25	2019-11-01	1	1		1	1	1	0	1	0	0	0	1	0	0	0	0			4	3	1	0	0	0	0	0	0	0	0	0	0	0	0			0	0
62	(identifier)	2	3	10 months + 1 week	44.45	999	3070	Y	Mum	2019-11-11	2019-11-11	2019-11-01	2	999		999	0	0	0	0	0	0	0	0	0	0	0	0			0	0	0	1	0	0	1	0	0	0	0	0	0	0	0			2	2
63	(identifier)	2	2	42 weeks	42	999	3067	Y	NR	2019-11-09	2019-11-09	2019-11-01	1	1		1	1	0	0	1	0	0	0	0	0	0	0	0			2	2	0	0	0	0	0	0	0	0	0	0	0	0	0			0	0
64	(identifier)	2	3	5 weeks	5	1	3070	Y	Business owner	2019-11-09	2019-11-09	2019-11-01	2	4		4	0	0	0	0	0	0	0	0	0	0	0	0			0	0	0	0	1	0	1	0	0	0	0	0	0	0	0			2	2
65	(identifier)	999	999	5 weeks	5	999	3107	Y	Program coodinator	2019-10-12	2019-10-12	2019-10-01	3	11	ongoing since 2-3/52 (first bout of mastitis)	17.5	0	1	0	1	0	0	0	0	0	1	1	0		little lumps that disappear after a feed	3	2	1	0	1	0	0	0	0	0	0	0	1	0	0			2	1
66	(identifier)	1	1	7 weeks	7	2	3068	Unknown	Buyer	2019-10-07	2019-10-07	2019-10-01	2	11	recurring blocked ducts since 10/7 ago; last night flared up more	1	0	0	0	0	0	0	0	0	0	0	0	0			0	0	0	1	1	0	1	0	0	1	0	0	0	0	0			4	3
67	(identifier)	2	2	4 days	0.57	1	3084	Y	Arts & Culture Coordinator	2019-09-30	2019-09-30	2019-09-01	3	11	since lactogenesis II (?day)	999	0	0	0	1	1	0	1	1	0	0	1	0	told to pump exclusively to let nipples heal - not getting any milk with pumping	engorgement	4	2	2	0	0	0	1	1	0	1	1	0	0	1	0	told to pump exclusively to let nipples heal - not getting any milk with pumping	engorgement	4	2
68	(identifier)	2	2	12 days	1.71	1	3053	Y	Doctor	2019-09-16	2019-09-16	2019-09-01	1	4		4	1	1	0	0	1	0	1	1	1	0	1	0	disrupted milk production with pumping	nipples & areola swollen	6	3	3	0	0	0	0	0	0	0	0	0	0	0	0			0	0
69	(identifier)	2	2	10 weeks	10	1	3071	Y	Social work	2019-09-14	2019-09-14	2019-09-01	2	2		2	0	0	0	0	0	0	0	0	0	0	0	0			0	0	0	1	0	0	0	0	0	0	0	0	0	1	0		awareness of R breast	1	1
70	(identifier)	1	1	5 weeks	5	1	3084	Y	IT project manager	2019-09-14	2019-09-14	2019-09-01	2	999		999	0	0	0	0	0	0	0	0	0	0	0	0			0	0	0	0	0	0	1	0	0	0	0	0	0	0	0			1	1
71	(identifier)	1	1	4 weeks	4	2	3068	Unknown	Architect	2019-09-12	2019-09-12	2019-09-01	1	11	patient unsure, approx. 8/7 ago	8	1	0	0	1	0	0	0	1	0	0	0	0			3	2	1	0	0	0	0	0	0	0	0	0	0	0	0			0	0
72	(identifier)	1	1	3 weeks	3	999	9999	Y	Midwife	2019-08-27	2019-08-27	2019-08-01	1	3		3	0	1	0	1	0	0	0	1	0	0	0	0			3	2	1	0	0	0	0	0	0	0	0	0	0	0	0			0	0
73	(identifier)	1	1	9 months	39.11	2	3078	Y	Lawyer	2019-08-27	2019-08-27	2019-08-01	1	1		1	0	0	0	1	0	0	0	0	0	0	0	0			1	1	0	0	0	0	0	0	0	0	0	0	0	0	0			0	0
74	(identifier)	1	1	5.5 months	23.9	999	3067	Y	Lawyer	2019-08-13	2019-08-13	2019-08-01	1	3		3	1	0	0	1	1	1	0	0	0	0	0	0	doesn't feel like milk is flowing as much as usual		4	3	1	0	0	0	0	0	0	0	0	0	0	0	0			0	0
75	(identifier)	1	1	10 weeks	10	1	9999	Y	Public servent	2019-06-24	2019-06-24	2019-06-01	2	11	3-4 days	3.5	0	0	0	0	0	0	0	0	0	0	0	0			0	0	0	1	1	0	1	0	0	0	0	0	0	0	0			2	2
76	(identifier)	2	2	7 weeks	7	999	3083	Y	Nurse	2019-08-08	2019-08-08	2019-08-01	1	1		1	1	0	0	1	0	0	0	0	0	0	0	0			2	2	0	0	0	0	0	0	0	0	0	0	0	0	0			0	0
77	(identifier)	2	2	5 months	21.73	2	3079	Y	Lawyer	2019-10-05	2019-10-05	2019-10-01	2	2		2	0	0	0	0	0	0	0	0	0	0	0	0			0	0	0	0	0	0	1	0	0	0	1	0	0	0	0			2	1
78	(identifier)	2	2	3 weeks	3	2	3058	Y	Occupational Therapist	2019-07-03	2019-07-03	2019-07-01	1	4		4	1	0	0	1	0	0	0	0	0	0	1	0		"sore & engorged"	2	2	0	0	0	0	0	0	0	0	0	0	0	0	0			0	0
79	(identifier)	1	1	9 months	39.11	1	3072	Unknown	Health worker	2019-09-14	2019-09-14	2019-09-01	2	1		1	0	0	0	0	0	0	0	0	0	0	0	0			0	0	0	1	0	0	1	0	0	0	1	0	0	0	0			3	2
80	(identifier)	1	1	4 weeks	4	1	3073	Unknown	Nurse	2019-06-14	2019-06-14	2019-06-01	2	3		3	0	0	0	0	0	0	0	0	0	0	0	0			0	0	0	1	0	0	1	0	0	1	1	0	0	0	0			4	2
81	(identifier)	2	3	12 months	52.14	999	3084	Y	Sales manager	2019-06-12	2019-06-12	2019-06-01	1	2		2	1	0	0	0	0	0	0	0	0	0	0	0			1	1	0	0	0	0	0	0	0	0	0	0	0	0	0			0	0
82	(identifier)	2	2	11 months	47.8	999	3072	Unknown	Landscape Architect	2019-05-25	2019-05-25	2019-05-01	1	7		7	1	0	0	0	0	1	0	1	0	0	0	0			3	1	2	0	0	0	0	0	0	0	0	0	0	0	0			0	0
83	(identifier)	2	2	14.5 weeks	14.5	1	3072	Y	Speech Pathologist	2019-05-21	2019-05-21	2019-05-01	1	1		1	1	0	0	1	0	0	0	0	0	0	0	0			2	2	0	0	0	0	0	0	0	0	0	0	0	0	0			0	0
84	(identifier)	1	1	6 weeks	6	999	3070	Unknown	Project Manager	2019-05-09	2019-05-09	2019-05-01	3	11	on & off since begun breastfeeding	999	1	0	0	1	0	0	1	1	0	0	0	0			4	2	2	1	0	0	0	0	0	0	1	0	0	0	0			2	1
85	(identifier)	1	1	12 days	1.71	1	3076	Unknown	Social worker	2019-05-01	2019-05-01	2019-05-01	2	2		2	0	0	0	0	0	0	0	0	0	0	0	0			0	0	0	0	0	0	1	0	0	1	1	0	0	0	0			3	1
86	(identifier)	2	2	6 months	26.07	999	3102	Y	Project Manager	2019-04-27	2019-04-27	2019-04-01	1	11	2 weeks	14	1	0	0	1	0	0	0	0	0	0	0	0			2	2	0	0	0	0	0	0	0	0	0	0	0	0	0			0	0
87	(identifier)	1	1	6 months	26.07	1	3071	Unknown	Nutritionist	2019-04-23	2019-04-23	2019-04-01	1	11	2-3 days	2.5	1	1	0	1	0	0	0	0	0	0	0	0			3	3	0	0	0	0	0	0	0	0	0	0	0	0	0			0	0
88	(identifier)	1	1	14 months	60.83	1	3078	Y	Mum	2019-04-02	2019-04-02	2019-04-01	1	0		0	0	0	0	0	0	0	0	0	0	0	1	1		"mastitis 5th time"	999	999	999	0	0	0	0	0	0	0	0	0	0	0	0			0	0
89	(identifier)	1	1	11 weeks	11	1	3073	Unknown	HR Manager	2019-04-03	2019-04-03	2019-04-01	1	2		2	1	1	1	1	1	0	0	0	0	0	1	0	Only getting 30-40ml with expressing L breast, normally 70-80ml.	Nipple 4 x size of R) one - with this bout of mastitis	5	5	0	0	0	0	0	0	0	0	0	0	0	0	0			0	0
90	(identifier)	1	1	2 weeks	2	1	3079	Y	Marketing Manager	2019-03-16	2019-03-16	2019-03-01	2	999		999	0	0	0	0	0	0	0	0	0	0	0	0			0	0	0	0	1	0	0	0	0	0	0	0	0	1	0		?lump - not able to feel but LC thinks that the lump is deep	1	1
91	(identifier)	1	1	7 weeks	7	1	3081	Y	Food technologist	2019-03-20	2019-03-20	2019-03-01	2	1		1	0	0	0	0	0	0	0	0	0	0	0	0			0	0	0	1	1	0	0	0	0	0	0	0	0	0	0			2	2
92	(identifier)	1	1	4.5 months	19.55	1	3071	Y	Lawyer	2019-03-18	2019-03-18	2019-03-01	2	2		2	0	0	0	0	0	0	0	0	0	0	0	0			0	0	0	0	1	0	1	0	0	0	0	0	0	0	0			2	2
93	(identifier)	1	1	4 months	17.38	2	9999	Y	NR	2019-03-14	2019-03-14	2019-03-01	1	1		1	1	0	0	1	0	0	0	1	0	0	0	0			3	2	1	0	0	0	0	0	0	0	0	0	0	0	0			0	0
94	(identifier)	2	2	4 weeks	4	1	3058	Unknown	Educator	2019-03-12	2019-03-12	2019-03-01	2	2		2	0	0	0	0	0	0	0	0	0	0	0	0			0	0	0	1	1	0	1	0	0	0	0	0	0	0	0			3	3
95	(identifier)	2	3	4 months	17.38	2	3102	Y	Photographer	2019-03-09	2019-03-09	2019-03-01	2	2		2	0	0	0	0	0	0	0	0	0	0	0	0			0	0	0	1	0	0	1	0	0	0	0	0	0	0	0			2	2+BA100
96	(identifier)	1	1	13 weeks	13	1	3078	Y	Nurse	2019-03-04	2019-03-04	2019-03-01	2	3		3	0	0	0	0	0	0	0	0	0	0	0	0			0	0	0	1	0	0	1	1	0	0	0	0	0	1	0	Not much milk off with EBM - 20-30mls from 20mins. Normally 100mls in 10mins.	nipple bit red	4	3
97	(identifier)	2	2	2.5 weeks	2.5	1	3070	Y	Tax manager	2019-02-23	2019-02-23	2019-02-01	1	6		6	1	1	0	1	1	0	0	1	0	0	0	0	not emptying as well		5	4	1	0	0	0	0	0	0	0	0	0	0	0	0			0	0
98	(identifier)	2	2	10 days old	1.43	1	3078	Y	Teacher	2019-01-23	2019-01-23	2019-01-01	2	1		1	0	0	0	0	0	0	0	0	0	0	0	0			0	0	0	1	0	0	1	0	0	0	0	0	0	0	0			2	2
99	(identifier)	2	2	9.5 months	41.28	999	3082	Y	Teacher	2019-10-21	2019-10-21	2019-10-01	1	1		1	1	0	0	1	0	0	0	0	0	0	0	0			2	2	0	0	0	0	0	0	0	0	0	0	0	0	0			0	0
100	(identifier)	1	1	6 weeks	6	1	3072	Y	Psychologist	2019-01-04	2019-01-04	2019-01-01	1	2		2	1	0	1	1	0	0	0	0	0	0	0	0			3	3	0	0	0	0	0	0	0	0	0	0	0	0	0			0	0
101	(identifier)	1	1	2 months	8.69	1	3070	Y	Communications	2019-01-03	2019-01-03	2019-01-01	1	1		1	0	0	0	1	0	1	0	0	0	0	0	0			2	1	1	0	0	0	0	0	0	0	0	0	0	0	0			0	0
102	(identifier)	1	1	3 weeks	3	2	3083	Y	Chef	2018-12-14	2018-12-14	2018-12-01	3	3		3	0	0	0	1	0	0	0	0	0	0	0	0			1	1	0	0	1	0	1	0	0	0	0	0	0	0	0			2	2
103	(identifier)	2	2	16 months	69.52	1	3072	Y	Accountant	2018-12-15	2018-12-15	2018-12-01	1	1		1	1	0	0	1	0	0	0	0	0	0	1	0		L) axillar pain	3	2	1	0	0	0	0	0	0	0	0	0	0	0	0			0	0
104	(identifier)	1	1	4.5 weeks	4.5	1	3075	Unknown	Physio	2018-12-01	2018-12-01	2018-12-01	2	2		2	0	0	0	0	0	0	0	0	0	0	0	0			0	0	0	1	0	0	1	1	0	0	1	0	0	0	0	not fully emptying		4	3
105	(identifier)	2	2	9 weeks	9	999	3081	Y	Orthoptist	2018-11-27	2018-11-27	2018-11-01	1	2		2	1	0	0	0	0	0	0	0	0	0	0	0			1	1	0	0	0	0	0	0	0	0	0	0	0	0	0			0	0
106	(identifier)	2	2	7 months	30.42	1	3070	Y	Sales	2018-11-09	2018-11-09	2018-11-01	1	2		2	1	0	0	1	0	0	0	0	0	0	0	0			2	2	0	0	0	0	0	0	0	0	0	0	0	0	0			0	0
107	(identifier)	2	2	8.5-9 months	38.02	2	3070	Unknown	Operations Manager	2019-07-11	2019-07-11	2019-07-01	2	1		1	0	0	0	0	0	0	0	0	0	0	0	0			0	0	0	1	0	0	1	0	0	0	0	0	0	0	0			2	2
108	(identifier)	1	1	8 weeks	8	2	3056	Unknown	Curator	2018-10-23	2018-10-23	2018-10-01	2	2		2	0	0	0	0	0	0	0	0	0	0	0	0			0	0	0	1	1	0	0	0	0	0	0	0	0	0	0			2	2
109	(identifier)	999	999	8 weeks	8	1	3072	Y	Social worker	2018-10-20	2018-10-20	2018-10-01	2	0		0	0	0	0	0	0	0	0	0	0	0	0	0			0	0	0	1	1	0	1	0	0	0	0	0	0	0	0			3	3
110	(identifier)	1	1	12 weeks	12	1	3056	Y	Shoe designer	2018-09-29	2018-09-29	2018-09-01	3	2		2	0	0	0	1	0	0	0	0	0	0	0	0			1	1	0	0	0	0	0	0	0	0	0	0	0	1	1		currently concerned re: R breast (re-occurring mastitis)	999	999
111	(identifier)	2	2	2.5 weeks	2.5	1	3073	Y	Stay at home mum	2018-09-19	2018-09-19	2018-09-01	1	999		999	1	0	0	1	0	0	0	0	0	0	0	0			2	2	0	0	0	0	0	0	0	0	0	0	0	0	0			0	0
112	(identifier)	1	1	13 months	56.49	1	3072	Y	Nutritionist/ Engagement Officer	2018-09-15	2018-09-15	2018-09-01	2	3		3	0	0	0	0	0	0	0	0	0	0	0	0			0	0	0	1	0	0	0	0	0	0	0	0	0	0	0			1	1
113	(identifier)	2	2	3.5 months	15.2	999	3083	Unknown	Nurse	2018-09-10	2018-09-10	2018-09-01	2	1		1	0	0	0	0	0	0	0	0	0	0	0	0			0	0	0	1	0	0	1	0	0	0	0	0	0	0	0			2	2
114	(identifier)	1	1	4 months	17.38	1	3068	Y	NR	2018-07-11	2018-07-11	2018-07-01	2	1		1	0	0	0	0	0	0	0	0	0	0	0	0			0	0	0	1	0	0	1	0	0	0	0	0	0	0	0			2	2
115	(identifier)	1	1	10 days	1.43	999	3073	Unknown	Researcher	2018-08-06	2018-08-06	2018-08-01	2	1		1	0	0	0	0	0	0	0	0	0	0	0	0			0	0	0	0	0	0	1	0	0	0	0	0	0	0	0			1	1
116	(identifier)	1	1	5 months	21.73	1	3121	Unknown	Geriatrician	2018-07-23	2018-07-23	2018-07-01	2	3		3	0	0	0	0	0	0	0	0	0	0	0	0			0	0	0	1	0	0	1	0	0	0	0	0	0	0	0			2	2
117	(identifier)	1	1	14 months	60.83	1	3070	Y	Product Manager	2018-06-26	2018-06-26	2018-06-01	2	1		1	0	0	0	0	0	0	0	0	0	0	0	0			0	0	0	1	0	0	0	0	0	0	0	0	0	0	0			1	1
118	(identifier)	2	2	4 weeks	4	1	3078	Y	Doctor	2018-05-28	2018-05-28	2018-05-01	1	3		3	1	0	0	1	0	0	1	0	0	0	0	0			3	2	1	0	0	0	0	0	0	0	0	0	0	0	0			0	0
119	(identifier)	1	1	11 weeks	11	1	3078	Y	Paediatrician	2018-05-29	2018-05-29	2018-05-01	3	11	persistent lumps that come & go with feeds	999	0	0	0	1	0	0	0	0	0	0	0	0			1	1	0	0	0	0	1	0	0	0	0	0	0	0	0			1	1
120	(identifier)	1	1	22 weeks	22	2	3070	Y	Marketing	2018-08-17	2018-08-17	2018-08-01	2	1		1	0	0	0	0	0	0	0	0	0	0	0	0			0	0	0	0	0	0	1	0	1	0	0	1	1	0	0			4	1
121	(identifier)	2	2	6 weeks	6	999	3799	Unknown	Child Protection Coordinator	2018-05-25	2018-05-25	2018-05-01	1	0		0	1	0	0	0	0	0	0	0	0	0	0	0			1	1	0	0	0	0	0	0	0	0	0	0	0	0	0			0	0
122	(identifier)	2	2	9 days	1.29	1	3057	Y	Admin	2018-05-23	2018-05-23	2018-05-01	1	3		3	0	0	0	0	0	0	0	0	0	0	1	1		had heat & redness - not today. L nipple was cracked, cleared, no nipple pain now	999	999	999	0	0	0	0	0	0	0	0	0	0	0	0			0	0
123	(identifier)	2	2	4 weeks	4	1	3058	Y	Teacher	2018-05-15	2018-05-15	2018-05-01	1	3		3	0	0	0	1	0	0	0	0	0	0	0	0			1	1	0	0	0	0	0	0	0	0	0	0	0	0	0			0	0
124	(identifier)	1	1	4 weeks	4	2	3072	Unknown	Teacher	2018-04-23	2018-04-23	2018-04-01	1	2		2	1	1	0	1	0	0	1	1	1	1	0	0			7	3	4	0	0	0	0	0	0	0	0	0	0	0	0			0	0
125	(identifier)	1	1	3 months	13.04	1	3072	Unknown	PhD Student	2018-04-21	2018-04-21	2018-04-01	1	999		999	0	0	0	1	0	0	0	0	0	0	0	0			1	1	0	0	0	0	0	0	0	0	0	0	0	0	0			0	0
126	(identifier)	2	2	7 weeks	7	1	3127	Unknown	Piano teacher	2018-03-24	2018-03-24	2018-03-01	1	2		2	0	0	0	1	0	0	0	0	0	0	0	0			1	1	0	0	0	0	0	0	0	0	0	0	0	0	0			0	0
127	(identifier)	1	1	6 weeks	6	1	3101	Y	Dietician	2017-11-23	2017-11-23	2017-11-01	1	11	last week	7	0	0	0	1	0	0	0	1	0	1	0	0			3	1	2	0	0	0	0	0	0	0	0	0	0	0	0			0	0
128	(identifier)	999	999	1 year old	52.14	999	3071	Y	Physiotherapist	2018-03-22	2018-03-22	2018-03-01	2	1		1	0	0	0	0	0	0	0	0	0	0	0	0			0	0	0	0	0	0	1	0	0	0	0	0	0	0	0			1	1
129	(identifier)	2	2	6 months	26.07	1	3071	Y	Project coordinator	2018-03-19	2018-03-19	2018-03-01	1	1		1	1	1	0	0	0	0	0	0	0	0	0	0			2	2	0	0	0	0	0	0	0	0	0	0	0	0	0			0	0
130	(identifier)	2	2	3 months	13.04	2	3072	Y	Lawyer	2020-08-10	2020-08-10	2020-08-01	1	1		1	0	0	0	1	0	0	0	1	0	0	0	0			2	1	1	0	0	0	0	0	0	0	0	0	0	0	0			0	0
131	(identifier)	999	999	6 weeks	6	2	3039	Y	NR	2018-03-05	2018-03-05	2018-03-01	2	3		3	0	0	0	0	0	0	0	0	0	0	0	0			0	0	0	0	0	0	1	0	0	0	0	0	0	1	0		initially pain & redness too	1	1
132	(identifier)	1	1	10 weeks	10	2	3057	Unknown	Occupational Therapist	2018-02-19	2018-02-19	2018-02-01	2	999		999	0	0	0	0	0	0	0	0	0	0	0	0			0	0	0	1	0	0	0	0	0	0	0	0	0	0	0			1	1
133	(identifier)	1	1	11.5 weeks	11.5	1	3084	Y	Vet	2018-02-28	2018-02-28	2018-02-01	1	0		0	0	1	0	0	0	0	0	0	0	0	0	0			1	1	0	0	0	0	0	0	0	0	0	0	0	0	0			0	0
134	(identifier)	2	2	8 months	34.76	1	3070	Y	Doctor	2018-01-22	2018-01-22	2018-01-01	2	3		3	0	0	0	0	0	0	0	0	0	0	0	0			0	0	0	0	0	0	1	0	0	0	0	0	0	1	0		yellowish spot on nipple	2	1
135	(identifier)	1	1	4.5 months	19.55	2	3111	Y	Real estate	2017-12-12	2017-12-12	2017-12-01	1	999		999	1	0	0	0	0	0	0	0	0	0	0	0			1	1	0	0	0	0	0	0	0	0	0	0	0	0	0			0	0
136	(identifier)	2	2	3 weeks	3	1	3056	Unknown	Landscape Architect	2017-11-20	2017-11-20	2017-11-01	2	999		999	0	0	0	0	0	0	0	0	0	0	0	0			0	0	0	0	0	0	1	0	0	1	1	0	0	0	0			3	1
137	(identifier)	1	1	2 weeks	2	1	3083	Y	Physiotherapist	2017-11-09	2017-11-09	2017-11-01	1	5		5	0	0	0	0	0	0	1	1	0	0	0	0			2	0	2	0	0	0	0	0	0	0	0	0	0	0	0			0	0
138	(identifier)	2	2	6 weeks	6	1	3078	Y	General Manager	2017-10-30	2017-10-30	2017-10-01	1	3		3	0	1	0	1	0	0	0	0	0	0	0	0			2	2	0	0	0	0	0	0	0	0	0	0	0	0	0			0	0
139	(identifier)	1	1	4.5 months	19.55	2	3058	Y	Scientist	2017-10-23	2017-10-23	2017-10-01	1	7		7	0	0	0	1	0	0	0	0	0	0	0	0			1	1	0	0	0	0	0	0	0	0	0	0	0	0	0			0	0
140	(identifier)	2	2	3 weeks	3	1	3085	Y	Occupational Therapist	2017-10-09	2017-10-09	2017-10-01	1	1		1	1	1	0	1	0	0	0	0	0	0	0	0			3	3	0	0	0	0	0	0	0	0	0	0	0	0	0			0	0
141	(identifier)	2	2	2 weeks	2	1	3500	Y	Art curator	2017-09-21	2017-09-21	2017-09-01	1	4		4	0	1	0	1	0	0	0	1	0	0	1	0		pitting oedema (orange peel)	4	3	1	0	0	0	0	0	0	0	0	0	0	0	0			0	0
142	(identifier)	1	1	7 months	30.42	2	3070	Y	Lawyer	2017-09-06	2017-09-06	2017-09-01	2	1		1	0	0	0	0	0	0	0	0	0	0	0	0			0	0	0	1	0	0	1	0	0	0	0	0	0	0	0			2	2
143	(identifier)	2	2	3.5 months	15.21	2	3107	Y	Accountant	2017-09-01	2017-09-01	2017-09-01	2	1		1	0	0	0	0	0	0	0	0	0	0	0	0			0	0	0	0	0	0	0	0	0	0	0	0	0	0	1			999	999
144	(identifier)	2	2	8 weeks	8	1	3102	Unknown	Medical affairs	2017-08-07	2017-08-07	2017-08-01	1	3		3	0	0	0	1	0	0	0	0	0	1	0	0			2	1	1	0	0	0	0	0	0	0	0	0	0	0	0			0	0
145	(identifier)	1	1	5 weeks	5	1	3073	Y	Marketing specialist	2017-07-27	2017-07-27	2017-07-01	2	999		999	0	0	0	0	0	0	0	0	0	0	0	0			0	0	0	0	0	0	1	0	0	0	0	0	0	0	0			1	1
146	(identifier)	2	2	8 weeks	8	1	3054	Y	Consultant	2017-07-13	2017-07-13	2017-07-01	2	2		2	0	0	0	0	0	0	0	0	0	0	0	0			0	0	0	0	1	0	0	0	0	0	0	0	0	0	0			1	1
147	(identifier)	1	1	4 months	17.38	1	3078	Y	Doctor	2017-10-25	2017-10-25	2017-10-01	1	0		0	1	1	0	0	0	1	0	1	0	0	0	0			4	2	2	0	0	0	0	0	0	0	0	0	0	0	0			0	0
148	(identifier)	999	999	4 months	17.38	1	3056	Unknown	Childcare	2019-07-07	2019-07-07	2019-07-01	1	10		10	0	0	0	1	0	0	0	0	0	0	0	0			1	1	0	0	0	0	0	0	0	0	0	0	0	0	0			0	0
149	(identifier)	1	1	2 weeks	2	2	3071	Unknown	Accountant	2019-11-15	2019-11-15	2019-11-01	3	5		5	1	0	0	1	0	0	1	0	0	0	0	0			3	2	1	1	0	0	1	0	0	1	0	0	0	0	0			3	2
150	(identifier)	2	2	3 weeks	3	1	3073	Y	Physio	2020-01-23	2020-01-23	2020-01-01	2	0		0	0	0	0	0	0	0	0	0	0	0	0	0			0	0	0	0	1	0	1	0	0	0	0	0	0	0	0			2	2
151	(identifier)	1	1	5 months	21.73	2	3056	Y	Engineer	2018-11-27	2018-11-27	2018-11-01	1	1		1	1	0	0	1	0	0	0	0	0	0	0	0			2	2	0	0	0	0	0	0	0	0	0	0	0	0	0			0	0
152	(identifier)	2	3	14 months	60.83	1	3068	Y	Veterinarian	2020-09-01	2020-09-01	2020-09-01	1	2		2	1	1	0	1	0	0	0	0	0	0	0	0			3	3	0	0	0	0	0	0	0	0	0	0	0	0	0			0	0
153	(identifier)	1	1	3 weeks	3	1	3078	Y	Public servent	2018-06-25	2018-06-25	2018-06-01	2	1		1	0	0	0	0	0	0	0	0	0	0	0	0			0	0	0	1	0	0	1	0	0	0	1	0	1	0	0			4	2
154	(identifier)	2	2	21 months	91.25	2	3078	Y	Mother	2018-03-14	2018-03-14	2018-03-01	2	0		0	0	0	0	0	0	0	0	0	0	0	0	0			0	0	0	1	0	0	0	0	1	0	0	0	0	0	0			2	1
155	(identifier)	2	2	6 weeks	6	1	3081	Y	Doctor	2020-09-09	2020-09-09	2020-09-01	1	999		999	0	0	0	1	0	0	0	0	0	0	0	0			1	1	0	0	0	0	0	0	0	0	0	0	0	0	0			0	0
156	(identifier)	2	2	6 months	26.07	1	3072	Unknown	Designer - graphics	2020-07-18	2020-07-18	2020-07-01	2	1		1	0	0	0	0	0	0	0	0	0	0	0	0			0	0	0	1	0	0	0	0	0	0	1	0	0	0	0			2	1
157	(identifier)	1	1	6 days	0.86	1	3072	Unknown	Social worker	2020-05-16	2020-05-16	2020-05-01	3	1		1	1	0	0	1	0	0	0	0	0	0	0	0			2	2	0	1	0	0	1	0	0	0	0	0	0	0	0			2	2
158	(identifier)	1	1	7 weeks	7	1	3056	Unknown	Jeweller	2020-03-23	2020-03-23	2020-03-01	1	4		4	0	0	0	0	0	1	0	0	1	0	0	0			2	0	2	0	0	0	0	0	0	0	0	0	0	0	0			0	0
159	(identifier)	2	2	6 months	26.07	2	3054	Y	Associate Professor	2020-03-19	2020-03-19	2020-03-01	1	1		1	0	0	0	1	0	0	0	0	0	0	0	0			1	1	0	0	0	0	0	0	0	0	0	0	0	0	0			0	0
160	(identifier)	1	1	4 months	17.38	2	3072	Y	Graphic designer	2016-08-19	2016-08-19	2016-08-01	2	0		0	0	0	0	0	0	0	0	0	0	0	0	0			0	0	0	0	0	0	0	0	0	0	0	0	0	1	1		"mastitis", nipple a bit red	1	1
[truncated: 93 more columns]

## Sheet: Variable dictionary
Variable / Field Name	Form Name	Section Header	Field Type	Field Label	Choices, Calculations, OR Slider Labels	Field Note	Text Validation Type OR Show Slider Number	Text Validation Min	Text Validation Max	Identifier?	Branching Logic (Show field only if...)	Required Field?	Custom Alignment	Question Number (surveys only)	Matrix Group Name	Matrix Ranking?	Field Annotation
record_id	demographics		text	Record ID
maternal_dob	demographics	<div class="rich-text-field-label"><h3>Demographics</h3></div>	text	Maternal DOB			date_dmy		2002-09-15	y		y
maternal_parity	demographics		dropdown	Maternal parity	1, Primiparity | 2, Multiparity | 999, Not reported		autocomplete					y
number_of_children (she gave birth to)	demographics		dropdown	Number of children	2, 2 | 3, 3 | 4, 4 | 5, 5 | 6, 6 | 7, Other | 999, Not reported		autocomplete				[maternal_parity] = '2'	y
bf_infant_age	demographics		text	Breastfeeding infant's age(s)								y
(infant's age in weeks for analysis)	demographics		text	Infant's age (in weeks)
infant_mode_delivery	demographics		dropdown	Mode of childbirth delivery	1, Vaginal | 2, Caesarean | 999, Not reported		autocomplete					y
postcode_ses	demographics		text	Postcode			number					y
private_health_insurance	demographics		dropdown	Private health insurance?	Y, Yes I Unknown, Unknown
maternal_occupation	demographics		text	Maternal occupation
appointment_date	patient_subjective_report	<div class="rich-text-field-label"><h3>ICLB characteristics</h3> <h4>Patient subjective report</h4></div>	text	Appointment date			date_dmy	2016-01-01	2020-09-15			y
(appointment date - formula format)	patient_subjective_report		text	Appointment date in formula format. For maternal age at appointment calculation.
(for month of presentation calculation)	patient_subjective_report		text	Month of appointment/presentation
affected_breast	patient_subjective_report		dropdown	Affected breast(s)	1, Left | 2, Right | 3, Bilateral | 999, Not reported		autocomplete					y
symptom_onset	patient_subjective_report		dropdown	Symptom onset (days ago)	0, Today | 1, 1 | 2, 2 | 3, 3 | 4, 4 | 5, 5 | 6, 6 | 7, 7 | 8, 8 | 9, 9 | 10, 10 | 11, Other | 999, Not reported		autocomplete					y
symptom_onset_other	patient_subjective_report		text	Symptom onset - Other							[symptom_onset] = '11'	y
(symptom onset in days for analysis)	patient_subjective_report		text	Symptom onset in days
left_local_symptoms	patient_subjective_report		checkbox	<div class="rich-text-field-label"><p>LEFT*: Local symptoms (type)</p> <p><em>*or not reported</em></p></div>	1, Pain/tenderness/discomfort | 2, Redness/erythema | 3, Increased temperature/heat/hot | 4, Swelling/tension/lump/hardness/tightness | 5, Impaired function | 6, Blocked nipple pore/milk bleb/white spot | 7, Nipple damage | 8, Nipple pain | 9, Nipple vasospasm | 10, Nipple thrush | 11, Other | 999, Not reported	Subjective report					[affected_breast] = '1' or [affected_breast] = '3' or [affected_breast] = '999'	y
left_impaired_function (text response)	patient_subjective_report		text	<div class="rich-text-field-label"><p>LEFT*: Impaired function (type)</p> <p><em>*or not reported</em></p></div>		Subjective report					[left_local_symptoms(5)] = '1'	y
left_local_sympt_other (text response)	patient_subjective_report		text	<div class="rich-text-field-label"><p>LEFT*: Local symptoms - Other (type)</p> <p><em>*or not reported</em></p></div>		Subjective report					[left_local_symptoms(11)] = '1'	y
left_local_sympt_number (TOTAL)	patient_subjective_report		dropdown	<div class="rich-text-field-label"><p>LEFT*: Local symptoms (total number)</p> <p><em>*or not reported</em></p></div>	0, 0 | 1, 1 | 2, 2 | 3, 3 | 4, 4 | 5, 5 | 6, 6 | 7, 7, | 8, 8 | 9, 9 | 10, 10 | 11, 11 | 12, 12 | 999, Not reported	Subjective report	autocomplete				[affected_breast] = '1' or [affected_breast] = '3' or [affected_breast] = '999'	y
left_local_sympt_number (BREAST)	patient_subjective_report		dropdown	LEFT: Local BREAST symptoms (total number)	0, 0 | 1, 1 | 2, 2 | 3, 3 | 4, 4 | 5, 5 | 6, 6 | 7, 7, | 8, 8 | 9, 9 | 10, 10 | 11, 11 | 12, 12 | 999, Not reported
left_local_sympt_number (NIPPLE)	patient_subjective_report		dropdown	LEFT: Local NIPPLE symptoms (total number)	0, 0 | 1, 1 | 2, 2 | 3, 3 | 4, 4 | 5, 5 | 6, 6 | 7, 7, | 8, 8 | 9, 9 | 10, 10 | 11, 11 | 12, 12 | 999, Not reported
right_local_symptoms	patient_subjective_report		checkbox	RIGHT: Local symptoms (type)	1, Pain/tenderness/discomfort | 2, Redness/erythema | 3, Increased temperature/heat/hot | 4, Swelling/tension/lump/hardness/tightness | 5, Impaired function | 6, Blocked nipple pore/milk bleb/white spot | 7, Nipple damage | 8, Nipple pain | 9, Nipple vasospasm | 10, Nipple thrush | 11, Other | 999, Not reported	Subjective report					[affected_breast] = '2' or [affected_breast] = '3'	y
right_impaired_function (text response)	patient_subjective_report		text	RIGHT: Impaired function (type)		Subjective report					[right_local_symptoms(5)] = '1'	y
right_local_sympt_other (text response)	patient_subjective_report		text	RIGHT: Local symptoms - Other (type)		Subjective report					[right_local_symptoms(11)] = '1'	y
right_local_sympt_number (TOTAL)	patient_subjective_report		dropdown	RIGHT: Local symptoms (total number)	0, 0 | 1, 1 | 2, 2 | 3, 3 | 4, 4 | 5, 5 | 6, 6 | 7, 7, | 8, 8 | 9, 9 | 10, 10 | 11, 11 | 12, 12 | 999, Not reported	Subjective report	autocomplete				[affected_breast] = '2' or [affected_breast] = '3'	y
right_local_sympt_number (BREAST)	patient_subjective_report		dropdown	RIGHT: Local BREAST symptoms (total number)
right_local_sympt_number (NIPPLE)	patient_subjective_report		dropdown	RIGHT: Local NIPPLE symptoms (total number)
systemic_symptoms	patient_subjective_report		checkbox	Systemic symptoms (type)	1, Fever/high temperature | 2, Generalised aches and pains/myalgia | 3, Headache | 4, Chills/rigors | 5, Sweating | 6, Malaise/ill/sick/unwell | 7, Fatigue/lethargy/increased tiredness | 8, Nausea or vomiting | 9, Dizziness or faintness | 10, Other | 0, Nil | 999, Not reported	Subjective report						y
systemic_sympt_other (text response)	patient_subjective_report		text	Systemic symptoms - Other (type)		Subjective report					[systemic_symptoms(10)] = '1'	y
systemic_sympt_number (TOTAL)	patient_subjective_report		dropdown	Systemic symptoms (total number)	0, 0 | 1, 1 | 2, 2 | 3, 3 | 4, 4 | 5, 5 | 6, 6 | 7, 7, | 8, 8 | 9, 9 | 10, 10 | 999, Not reported	Subjective report	autocomplete					y
episodic_systemic_symptoms	patient_subjective_report		dropdown	Systemic symptoms in their current presentation episode	1. Definitely systemic right now; 2. Definitely non-systemic right now; 3. Ill defined (‘resolving systemic symptoms’ or ‘vague’); 4. Not recorded	Subjective report
currently_on_antibiotics	patient_subjective_report		dropdown	Current AB use for ICLB	Y, Yes | N, No | NR, Not reported	Subjective report	autocomplete					y
bissi_affected_breast	bissi_scores_initial		dropdown	Affected breast	1, Left | 2, Right | 999, Not reported		autocomplete					y
bissi_pain_awareness	bissi_scores_initial		dropdown	Pain (awareness)	0, 0 - None | 1, 1 | 2, 2 | 3, 3 | 4, 4 | 5, 5 | 6, 6 | 7, 7 | 8, 8 | 9, 9 | 10, 10 - Worst | 11, Other | 999, Not reported		autocomplete					y	RH
bissi_pain_aware_oth	bissi_scores_initial		text	Pain (awareness) - Other score							[bissi_pain_awareness_i1] = '11'	y
bissi_pain_touch	bissi_scores_initial		dropdown	Pain (touch)	0, 0 - None | 1, 1 | 2, 2 | 3, 3 | 4, 4 | 5, 5 | 6, 6 | 7, 7 | 8, 8 | 9, 9 | 10, 10 - Worst | 11, Other | 999, Not reported		autocomplete					y	RH
bissi_pain_touch_oth	bissi_scores_initial		text	Pain (touch) - Other score							[bissi_pain_touch_i1] = '11'	y
bissi_wellness_select	bissi_scores_initial		checkbox	Wellness/sickness	1, Fever | 2, Generalised aches and pains | 3, Headache | 4, Other - specified | 5, Unspecified - sickness							y
bissi_wellness_fever	bissi_scores_initial		dropdown	Wellness/sickness (fever)	0, 0 - None | 1, 1 | 2, 2 | 3, 3 | 4, 4 | 5, 5 | 6, 6 | 7, 7 | 8, 8 | 9, 9 | 10, 10 - Worst | 11, Other | 999, Not reported		autocomplete				[bissi_wellness_select_i1(1)] = '1'	y	RH
bissi_wellnessfever_oth	bissi_scores_initial		text	Wellness/sickness (fever) - Other score							[bissi_wellness_fever_i1] = '11'	y
bissi_wellness_aches	bissi_scores_initial		dropdown	Wellness/sickness (generalised aches and pains)	0, 0 - None | 1, 1 | 2, 2 | 3, 3 | 4, 4 | 5, 5 | 6, 6 | 7, 7 | 8, 8 | 9, 9 | 10, 10 - Worst | 11, Other | 999, Not reported		autocomplete				[bissi_wellness_select_i1(2)] = '1'	y	RH
bissi_wellnessaches_oth	bissi_scores_initial		text	Wellness/sickness (generalised aches and pains) - Other score							[bissi_wellness_aches_i1] = '11'	y	RH
bissi_wellnessheadache	bissi_scores_initial		dropdown	Wellness/sickness (headache)	0, 0 - None | 1, 1 | 2, 2 | 3, 3 | 4, 4 | 5, 5 | 6, 6 | 7, 7 | 8, 8 | 9, 9 | 10, 10 - Worst | 11, Other | 999, Not reported		autocomplete				[bissi_wellness_select_i1(3)] = '1'	y	RH
bissi_well_headac_oth	bissi_scores_initial		text	Wellness/sickness (headache) - Other score							[bissi_wellnessheadache_i1] = '11'	y	RH
bissi_wellness_oth_type	bissi_scores_initial		text	Wellness/sickness (Other specified; type)							[bissi_wellness_select_i1(4)] = '1'	y	RH
bissi_wellness_oth_scor	bissi_scores_initial		dropdown	Wellness/sickness (Other specified; score)	0, 0 - None | 1, 1 | 2, 2 | 3, 3 | 4, 4 | 5, 5 | 6, 6 | 7, 7 | 8, 8 | 9, 9 | 10, 10 - Worst | 11, Other | 999, Not reported		autocomplete				[bissi_wellness_select_i1(4)] = '1'	y	RH
bissi_wellness_unspec	bissi_scores_initial		dropdown	Wellness/sickness (Unspecified - sickness)	0, 0 - None | 1, 1 | 2, 2 | 3, 3 | 4, 4 | 5, 5 | 6, 6 | 7, 7 | 8, 8 | 9, 9 | 10, 10 - Worst | 11, Other | 999, Not reported		autocomplete				[bissi_wellness_select_i1(5)] = '1'	y	RH
bissi_hardness	bissi_scores_initial		dropdown	Hardness/tightness	1, 1 - Usual, soft, not hard/tight | 2, 2 - Slightly hard/tight | 3, 3 - Hard/tight | 4, 4 - Very hard/tight | 5, 5 - Extremely hard/tight | 6, Other | 999, Not reported		autocomplete					y	RH
bissi_temperature	bissi_scores_initial		dropdown	Temperature of affected area	1, 1 - Usual - the whole breast is healthy | 2, 2 - Mild warmth | 3, 3 - Warm | 4, 4 - Hot | 5, 5 - Very hot | 6, Other | 999, Not reported		autocomplete					y	RH
bissi_temperature_oth	bissi_scores_initial		text	Temperature of affected area - Other							[bissi_temperature_i1] = '6'	y
bissi_redness	bissi_scores_initial		dropdown	Redness	1, 1 - Usual, not red | 2, 2 - Slightly red | 3, 3 - Red | 4, 4 - Very red | 5, 5 - Extremely red | 6, Other | 999, Not reported		autocomplete					y	RH
bissi_affected_area	bissi_scores_initial		dropdown	Affected area	1, 1 - Usual - no area is affected, the whole breast is healthy | 2, 2 - a small area - less than 1/4 of whole breast | 3, 3 - a medium area - between 1/4 and 1/2 of whole breast | 4, 4 - a big area - between 1/2 and 3/4 of whole breast | 5, 5 - a very big area - more than 3/4 of whole breast | 6, Other | 999, Not reported		autocomplete					y	RH
bissi_impact	bissi_scores_initial		dropdown	Impact	0, 0 - Not at all | 1, 1 | 2, 2 | 3, 3 | 4, 4 | 5, 5 | 6, 6 | 7, 7 | 8, 8 | 9, 9 | 10, 10 - extremely/a great deal | 11, Other | 999, Not reported		autocomplete					y	RH
Total BISSI scores	bissi_scores_initial		text	Total BISSI score initial appointment (pre)
clinician_number	clinicians_assessment_initial	<div class="rich-text-field-label"><h3>Objective section of treatment notes</h3> <h4>Clinician's assessment (pre-treatment)</h4></div>	dropdown	Clinician number	1, 1 | 2, 2 | 3, 3 | 4, 4 | 5, 5 | 6, 6 | 7, 7 | 8, 8 | 9, 9 | 10, 10 | 11, 11 | 12, 12 | 13, 13 | 14, 14 | 15, 15 | 16, 16 | 17, 17 | 18, 18 | 19, Other		autocomplete					y
clin_affected_breast	clinicians_assessment_initial		dropdown	Affected breast	1, Left | 2, Right | 3, Bilateral | 999, Not reported | 0, No affected breast		autocomplete					y
clin_leftbreast_location	clinicians_assessment_initial		checkbox	<div class="rich-text-field-label"><p>LEFT breast*: Location</p> <p><em>*or not reported</em></p></div>	1, Superior lateral quadrant (12 - 3 o'clock) | 2, Superior medial quadrant (9 - 12 o'clock) | 3, Inferior medial quadrant (6 - 9 o'clock) | 4, Inferior lateral quadrant (3 - 6 o'clock) | 999, Not reported	Clinician assessment					[clin_affected_breast_i] = '1' or [clin_affected_breast_i] = '3' or [clin_affected_breast_i] = '999'	y
clin_leftbreast_inflamms	clinicians_assessment_initial		checkbox	<div class="rich-text-field-label"><p>LEFT breast*: Inflammatory signs</p> <p><em>*or not reported</em></p></div>	1, Pain/tenderness/discomfort on palpation | 2, Redness/erythema | 3, Increased temperature/heat/hot | 4, Swelling/tension/lump/hardness/tightness | 5, Other | 999, Not reported	Clinician assessment					[clin_affected_breast_i] = '1' or [clin_affected_breast_i] = '3' or [clin_affected_breast_i] = '999'	y
clin_left_inflamms_oth (text response)	clinicians_assessment_initial		text	<div class="rich-text-field-label"><p>LEFT breast*: Inflammatory signs - Other (type)</p> <p><em>*or not reported</em></p></div>		Clinician assessment					[clin_leftbreast_inflamms_i(5)] = '1'	y
left_number_inflamms	clinicians_assessment_initial		dropdown	<div class="rich-text-field-label"><p>LEFT breast*: Inflammatory signs (total number)</p> <p><em>*or not reported</em></p></div>	0, 0 | 1, 1 | 2, 2 | 3, 3 | 4, 4 | 5, 5 | 6, 6 | 7, 7 | 8, 8 | 9, Other | 999, Not reported	Clinician assessment	autocomplete				[clin_affected_breast_i] = '1' or [clin_affected_breast_i] = '3' or [clin_affected_breast_i] = '999'	y
clin_rghtbreast_location	clinicians_assessment_initial		checkbox	RIGHT breast: Location	1, Superior lateral quadrant (9 - 12 o'clock) | 2, Superior medial quadrant (12 - 3 o'clock) | 3, Inferior medial quadrant (3 - 6 o'clock) | 4, Inferior lateral quadrant (6 - 9 o'clock) | 999, Not reported	Clinician assessment					[clin_affected_breast_i] = '2' or [clin_affected_breast_i] = '3'	y
clin_rghtbreast_inflamms	clinicians_assessment_initial		checkbox	RIGHT breast: Inflammatory signs	1, Pain/tenderness/discomfort on palpation | 2, Redness/erythema | 3, Increased temperature/heat/hot | 4, Swelling/tension/lump/hardness/tightness | 5, Other | 999, Not reported	Clinician assessment					[clin_affected_breast_i] = '2' or [clin_affected_breast_i] = '3'	y
clin_rght_inflamms_oth (text response)	clinicians_assessment_initial		text	RIGHT breast: Inflammatory signs - Other (type)		Clinician assessment					[clin_rghtbreast_inflamms_i(5)] = '1'	y
rght_number_inflamms_i	clinicians_assessment_initial		dropdown	RIGHT: Inflammatory signs (total number)	0, 0 | 1, 1 | 2, 2 | 3, 3 | 4, 4 | 5, 5 | 6, 6 | 7, 7 | 8, 8 | 9, Other | 999, Not reported	Clinician assessment	autocomplete				[clin_affected_breast_i] = '2' or [clin_affected_breast_i] = '3'	y
clin_affected_nipples	clinicians_assessment_initial		dropdown	Affected nipple(s)	1, Yes - Left | 2, Yes - Right | 3, Yes - Bilateral | 4, Yes - not specified | 0, No | 999, Not reported	Clinician assessment	autocomplete					y
clin_left_nipple_appear	clinicians_assessment_initial		checkbox	<div class="rich-text-field-label"><p>LEFT nipple*: Integrity/appearance</p> <p><em>*or not specified</em></p></div>	1, Nipple damage | 2, White spot/milk bleb(s) | 3, Inverted/retracted | 4, Other	Clinician assessment					[clin_affected_nipples_i] = '1' or [clin_affected_nipples_i] = '3' or [clin_affected_nipples_i] = '4'	y
clin_left_bleb_location	clinicians_assessment_initial		checkbox	<div class="rich-text-field-label"><p>LEFT nipple*: White spot/milk bleb location</p> <p><em>*or not specified</em></p></div>	1, Superior lateral quadrant (12 - 3 o'clock) | 2, Superior medial quadrant (9 - 12 o'clock) | 3, Inferior medial quadrant (6 - 9 o'clock) | 4, Inferior lateral quadrant (3 - 6 o'clock) | 999, Not reported	Clinician assessment					[clin_left_nipple_appear_i(2)] = '1'	y
clin_left_nipple_oth (text response)	clinicians_assessment_initial		text	<div class="rich-text-field-label"><p>LEFT nipple*: Integrity/appearance - Other (type)</p> <p><em>*or not specified</em></p></div>		Clinician assessment					[clin_left_nipple_appear_i(4)] = '1'	y
clin_right_nipple_appear	clinicians_assessment_initial		checkbox	RIGHT nipple: Integrity/appearance	1, Nipple damage | 2, White spot/milk bleb(s) | 3, Inverted/retracted | 4, Other	Clinician assessment					[clin_affected_nipples_i] = '2' or [clin_affected_nipples_i] = '3'	y
clin_rght_bleb_location	clinicians_assessment_initial		checkbox	RIGHT nipple: White spot/milk bleb location	1, Superior lateral quadrant (9 - 12 o'clock) | 2, Superior medial quadrant (12 - 3 o'clock) | 3, Inferior medial quadrant (3 - 6 o'clock) | 4, Inferior lateral quadrant (6 - 9 o'clock) | 999, Not reported	Clinician assessment					[clin_right_nipple_appear_i(2)] = '1'	y
clin_right_nipple_oth (text response)	clinicians_assessment_initial		text	RIGHT nipple: Integrity/appearance - Other (type)		Clinician assessment					[clin_right_nipple_appear_i(4)] = '1'	y
≥1 systemic symptom (Amir's mastitis definition) WHOLE EPISODE	(Calculation for high symptom severity - discriminant analysis)				NR, Not reported | Y, Yes | N, No.
≥1 systemic symptom (Amir's mastitis definition) RIGHT NOW	(Calculation for high symptom severity - discriminant analysis)				NR, Not reported | Y, Yes | N, No | Unsure, Vague as to whether experiencing systemic symptoms currently.
≥2 local symptoms (Amir's mastitis definition) WHOLE EPISODE	(Calculation for high symptom severity - discriminant analysis)				NR, Not reported | Y, Yes | N, No.
≥2 local symptoms (Amir's mastitis definition) RIGHT NOW	(Calculation for high symptom severity - discriminant analysis)				NR, Not reported | Y, Yes | N, No.
AMIR'S MASTITIS DEFINITION (WHOLE EPISODE)	(Calculation for high symptom severity - discriminant analysis)				NR, Not reported | Y, Yes | N, No | Unable to determine, Systemic symptoms NR or Unsure.
AMIR'S MASTITIS DEFINITION (RIGHT NOW)	(Calculation for high symptom severity - discriminant analysis)				NR, Not reported | Y, Yes | N, No | Unable to determine, Systemic symptoms NR or Unsure.
